# Supplementary material for: A novel TP53-KPNA3 translocation defines a de novo treatment-resistant clone in osteosarcoma
Source: PubMed Central journal article supplement — Cold Spring Harb Mol Case Stud. 2016 Sep;2(5):a000992. doi: 10.1101/mcs.a000992 (PMC5002927; doi:10.1101/mcs.a000992), 2016-09
Supplement: supp_mcs.a000992_Fig_S1_venn_copy.pdf [file supp_mcs.a000992_Fig_S1_venn_copy.pdf]

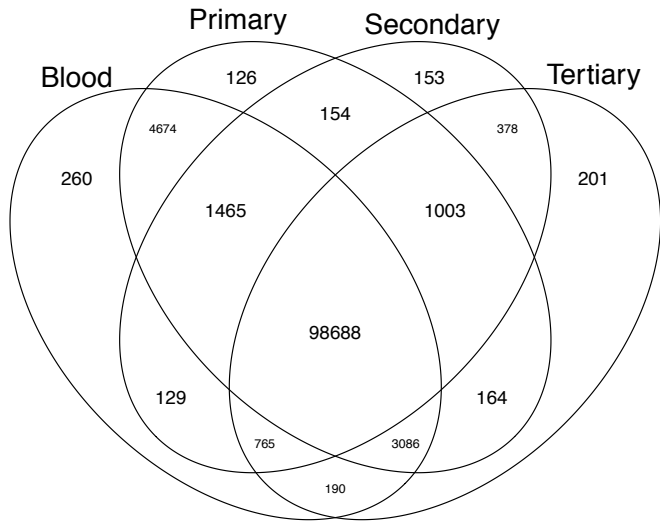

**Supplementary Figure S1.** The germline variants were obtained using GATK HaplotypeCaller and the overlaps of the variants between samples were estimated.
