# Supplementary material for: A novel TP53-KPNA3 translocation defines a de novo treatment-resistant clone in osteosarcoma
Source: PubMed Central journal article supplement — Cold Spring Harb Mol Case Stud. 2016 Sep;2(5):a000992. doi: 10.1101/mcs.a000992 (PMC5002927; doi:10.1101/mcs.a000992), 2016-09
Supplement: supp_mcs.a000992_Fig_S2_fish_copy.pdf [file supp_mcs.a000992_Fig_S2_fish_copy.pdf]

secondary

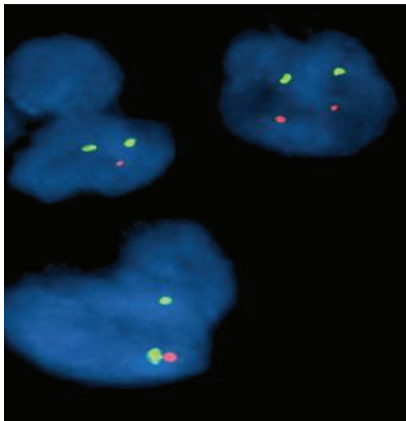

tertiary

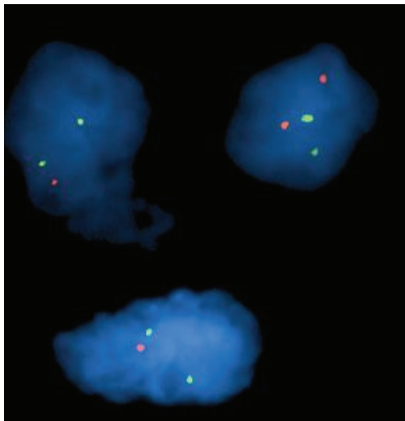

**Supplementary Figure S2. Fluorescence in situ hybridization (FISH) in secondary and tertiary tumor samples. FISH for TP53 (orange) and chromosome 17 centromere (green).**
