# Supplementary material for: A novel TP53-KPNA3 translocation defines a de novo treatment-resistant clone in osteosarcoma
Source: PubMed Central journal article supplement — Cold Spring Harb Mol Case Stud. 2016 Sep;2(5):a000992. doi: 10.1101/mcs.a000992 (PMC5002927; doi:10.1101/mcs.a000992), 2016-09
Supplement: supp_mcs.a000992_Fig_S3_p53_IHC_copy.pdf [file supp_mcs.a000992_Fig_S3_p53_IHC_copy.pdf]

**H&E****p53****biopsy**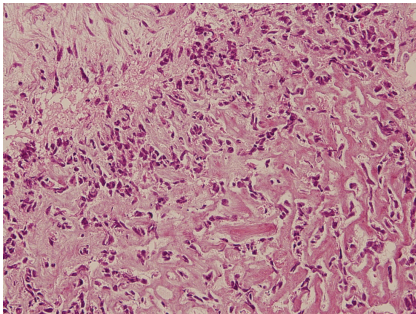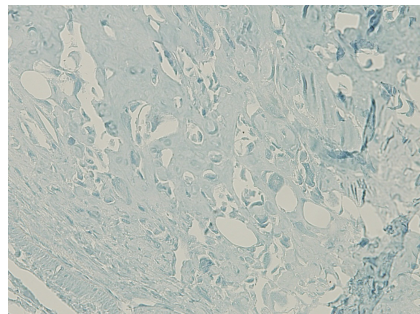**primary**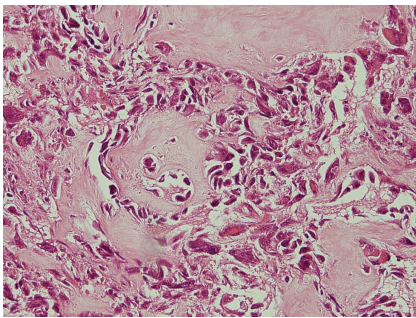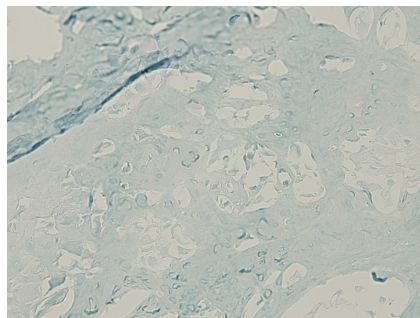**secondary**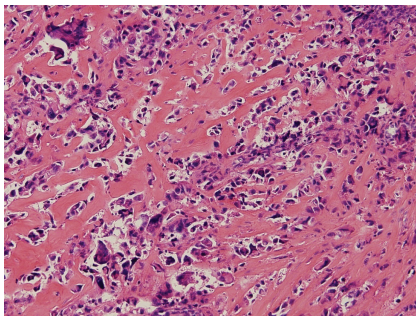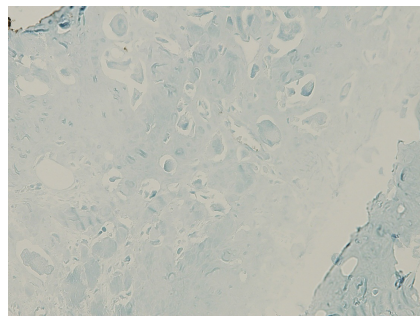**tertiary**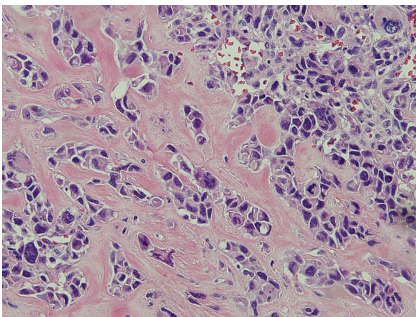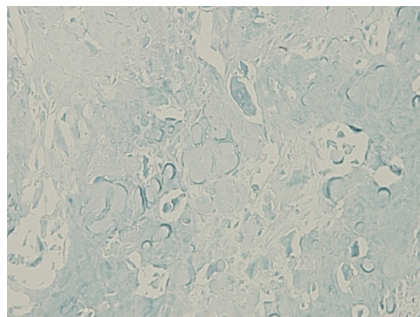**positive control**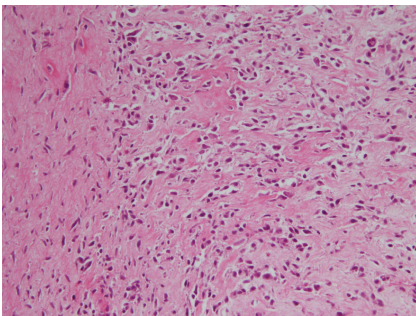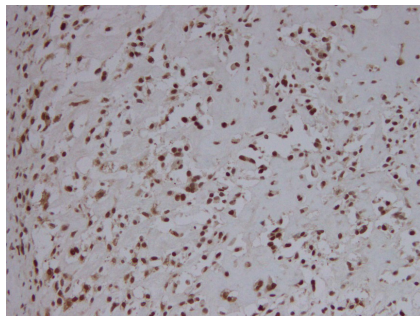

**Supplementary Figure S3. Immunohistochemistry for p53.** P53 was undetectable by immunohistochemistry in all four tumor samples. An unrelated osteosarcoma case was used as a positive control.
